# Supplementary material for: Realization of efficient and selective NO and NO2 detection via surface functionalized h-B2S2 monolayer
Source: Royal Society of Chemistry journal article supplement (doi:10.1039/d4cp00332b), 2024-01-01
Supplement: d4cp00332b2.pdf [file d4cp00332b2.pdf]

## Supporting Information

### **Realization of efficient and selective NO and NO<sub>2</sub> detection *via* surface functionalized h-B<sub>2</sub>S<sub>2</sub> monolayer**

Upasana Nath and Manabendra Sarma\*

Department of Chemistry, Indian Institute of Technology Guwahati

Assam- 781039, India

Email: [msarma@iitg.ac.in](mailto:msarma@iitg.ac.in)

## Table of Contents

**Equation S1:** Calculation of binding energy ( $E_b$ ).

**Equation S2:** Calculation of cohesive energy ( $E_{coh}$ ).

**Fig. S1:** Projected density of phonon states (PhDOS) plot of Oh-B<sub>2</sub>S<sub>2</sub> monolayer.

**Fig. S2:** (a) Charge density difference (CDD) plot of h-B<sub>2</sub>S<sub>2</sub> monolayer (blue and pink colors indicate the charge accumulation and depletion region, respectively) and (b) most preferable adsorption configuration and CDD plots of (I) NO and (II) NO<sub>2</sub> adsorbed h-B<sub>2</sub>S<sub>2</sub> monolayer.

**Fig. S3:** Electron localization functions of oxygen functionalized h-B<sub>2</sub>S<sub>2</sub> (Oh-B<sub>2</sub>S<sub>2</sub>) monolayer. ELF=1.0 (red color) indicates complete localization of electrons, while ELF=0.5 (green color) indicates delocalization. (a) 100-plane and (b) 110-plane.

**Table S1:** Binding energy ( $E_b$ ) and S-O bond length of OT-B<sub>2</sub>S<sub>2</sub> monolayer using PBE-GGA functional.

**Fig. S4:** Linear fitting deformation potential and curve fitting elastic modulus plots of h-B<sub>2</sub>S<sub>2</sub>, Oh-B<sub>2</sub>S<sub>2</sub>, and MoS<sub>2</sub>.

**Table S2:** Effective mass and deformation potential of electrons and holes, and elastic modulus of MoS<sub>2</sub> and Oh-B<sub>2</sub>S<sub>2</sub> monolayer.

**Fig. S5:** Different orientations of (a) CO, (b) NO, (c) CO<sub>2</sub>, (d) NO<sub>2</sub>, (e) N<sub>2</sub>O, and (f) SO<sub>2</sub> molecules on Oh-B<sub>2</sub>S<sub>2</sub> monolayer.

**Fig. S6:** Potential energy curves (PECs) of (a) CO, (b) NO, (c) CO<sub>2</sub>, (d) NO<sub>2</sub>, (e) N<sub>2</sub>O, and (f) SO<sub>2</sub> molecules on Oh-B<sub>2</sub>S<sub>2</sub> monolayer.

**Table S3:** Results obtained from spin-polarized density functional theory (SPDFT).

**Table S4:** Adsorption energies ( $E_{ads}$ ), adsorption distances (AD), and charge transfer ( $Q_e$ ) values of NO and NO<sub>2</sub>-adsorbed Oh-B<sub>2</sub>S<sub>2</sub> monolayer for 4×4 and 5×5 supercells.

**Fig. S7:** Spin-polarized density of states (SPDOS) (a) NO and (b) NO<sub>2</sub> -adsorbed Oh-B<sub>2</sub>S<sub>2</sub> monolayer. Blue and red are the density of states (DOS) of Oh-B<sub>2</sub>S<sub>2</sub> monolayer and gas molecules, respectively.

**Fig. S8:** The optimized geometries associated with the favorable adsorption configuration for (a) H<sub>2</sub>, (b) N<sub>2</sub>, (c) O<sub>2</sub>, (d) H<sub>2</sub>O, (e) O<sub>3</sub>, and (f) CH<sub>4</sub> on Oh-B<sub>2</sub>S<sub>2</sub> monolayer.

**Table S5:** Adsorption energies ( $E_{ads}$ ) and charge transfer ( $Q_e$ ) values of NO, NO<sub>2</sub>, H<sub>2</sub>, N<sub>2</sub>, O<sub>2</sub>, H<sub>2</sub>O, O<sub>3</sub>, and CH<sub>4</sub> on Oh-B<sub>2</sub>S<sub>2</sub> monolayer.

**Fig. S9:** Adsorption energies ( $E_{ads}$ ) and charge transfer ( $Q_e$ ) plots of NO, NO<sub>2</sub>, H<sub>2</sub>, N<sub>2</sub>, O<sub>2</sub>, H<sub>2</sub>O, O<sub>3</sub>, and CH<sub>4</sub> on Oh-B<sub>2</sub>S<sub>2</sub> monolayer.

**Fig. S10:** Average electrostatic potential plots of (a) Oh-B<sub>2</sub>S<sub>2</sub>, (b) NO-adsorbed Oh-B<sub>2</sub>S<sub>2</sub>, and (c) NO<sub>2</sub>-adsorbed Oh-B<sub>2</sub>S<sub>2</sub> monolayer. The blue and red plots depict the without dipole correction and with dipole correction.

**Fig. S11:** Transmission spectra T(E) plots of Oh-B<sub>2</sub>S<sub>2</sub> at different bias voltages.

**Fig. S12:** Transmission spectra T(E) plots of NO-adsorbed Oh-B<sub>2</sub>S<sub>2</sub> at different bias voltages.

**Fig. S13:** Transmission spectra T(E) plots of NO<sub>2</sub>-adsorbed Oh-B<sub>2</sub>S<sub>2</sub> at different bias voltages

**Equation S1:** Calculation of binding energy ( $E_b$ ). [1]

$$E_b = E_{Oh-B_2S_2} - E_{h-B_2S_2} - E_{atom}$$

$E_{Oh-B_2S_2}$ ,  $E_{h-B_2S_2}$ , and  $E_{atom}$  indicates the total energy of oxygen functionalized h-B<sub>2</sub>S<sub>2</sub>, h-B<sub>2</sub>S<sub>2</sub> and O-atom.

**Equation S2:** Calculation of cohesive energy ( $E_{coh}$ ). [2]

$$E_{coh} = \frac{(2E_B + 2E_S + E_O) - E_{Oh-B_2S_2}}{5}$$

$E_B$ ,  $E_S$ , and  $E_O$ , are the energy of individual B-atom, S-atom, and O-atom, respectively. and  $E_{Oh-B_2S_2}$  is the energy of the oxygen functionalized h-B<sub>2</sub>S<sub>2</sub> monolayer.

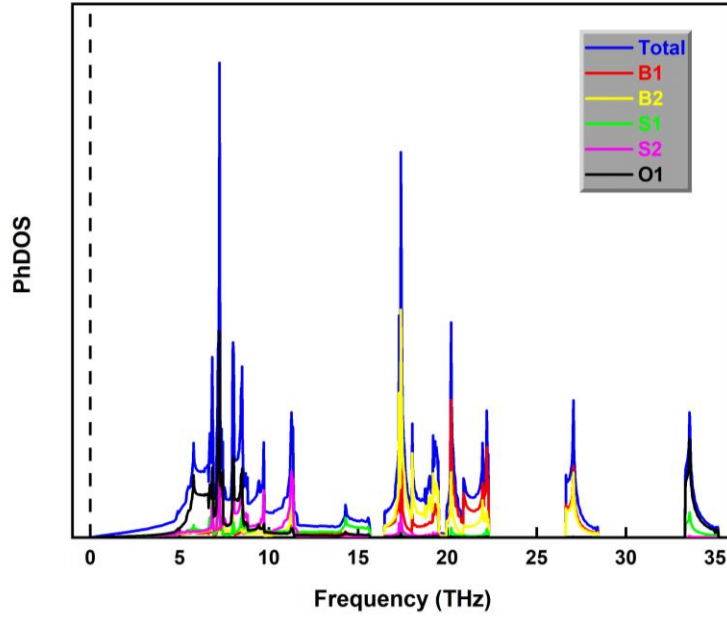

**Fig. S1:** Projected density of phonon states (PhDOS) plot of Oh-B<sub>2</sub>S<sub>2</sub> monolayer.

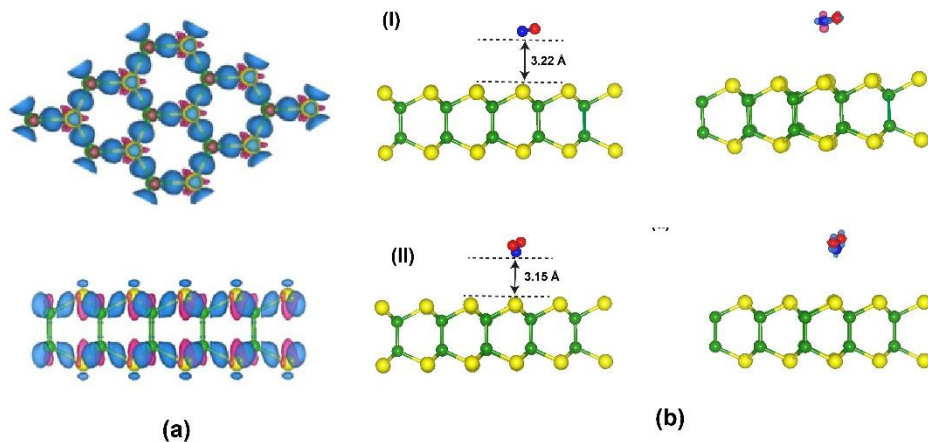

**Fig. S2:** (a) Charge density difference (CDD) plot of h-B<sub>2</sub>S<sub>2</sub> monolayer (blue and pink colors indicate the charge accumulation and depletion region, respectively) and (b) most preferable adsorption configuration and CDD plots of (I) NO and (II) NO<sub>2</sub> adsorbed h-B<sub>2</sub>S<sub>2</sub> monolayer.

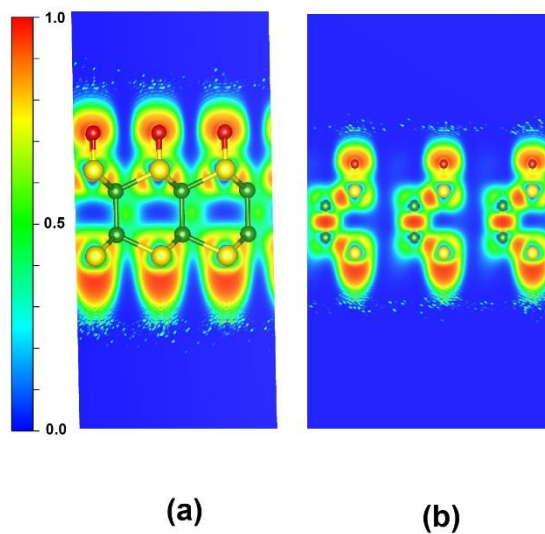

**Fig. S3:** Electron localization functions of oxygen functionalized h-B<sub>2</sub>S<sub>2</sub> (Oh-B<sub>2</sub>S<sub>2</sub>) monolayer. ELF=1.0 (red color) indicates complete localization of electrons, while ELF=0.5 (green color) indicates delocalization. (a) 100-plane and (b) 110-plane.

**Table S1:** Binding energy ( $E_b$ ) and S-O bond length of OT-B<sub>2</sub>S<sub>2</sub> monolayer using PBE-GGA functional.

| Parameters          | Calculated<br>(Our results) | Reported<br>(Previous work [1]) |
|---------------------|-----------------------------|---------------------------------|
| Binding energy (eV) | -4.42                       | -4.01                           |
| S-O bond length (Å) | 1.47                        | 1.48                            |

**For h-B<sub>2</sub>S<sub>2</sub> system**

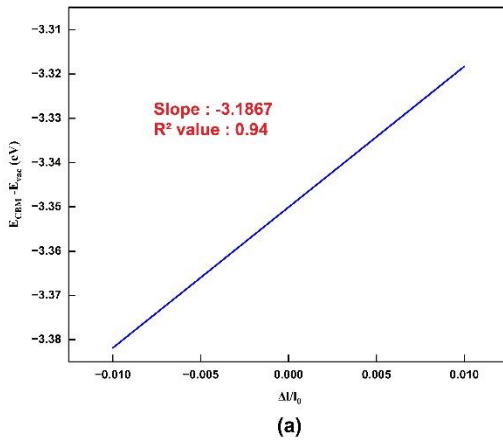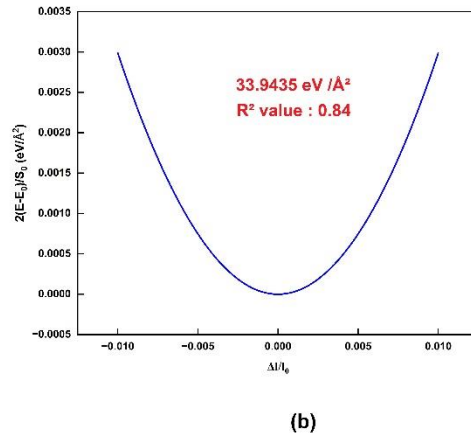

(a) Linear fitting of deformation potential and (b) curve fitting of elastic modulus of h-B<sub>2</sub>S<sub>2</sub> monolayer.

**Calculated:  $\mu$  (K-F):  $1152.25 \times 10^2 \text{ cm}^2 \text{ V}^{-1} \text{ s}^{-1}$**

**Reported [3]:  $\mu$  (K-F):  $1211.67 \times 10^2 \text{ cm}^2 \text{ V}^{-1} \text{ s}$**

**For Oh-B<sub>2</sub>S<sub>2</sub> system**

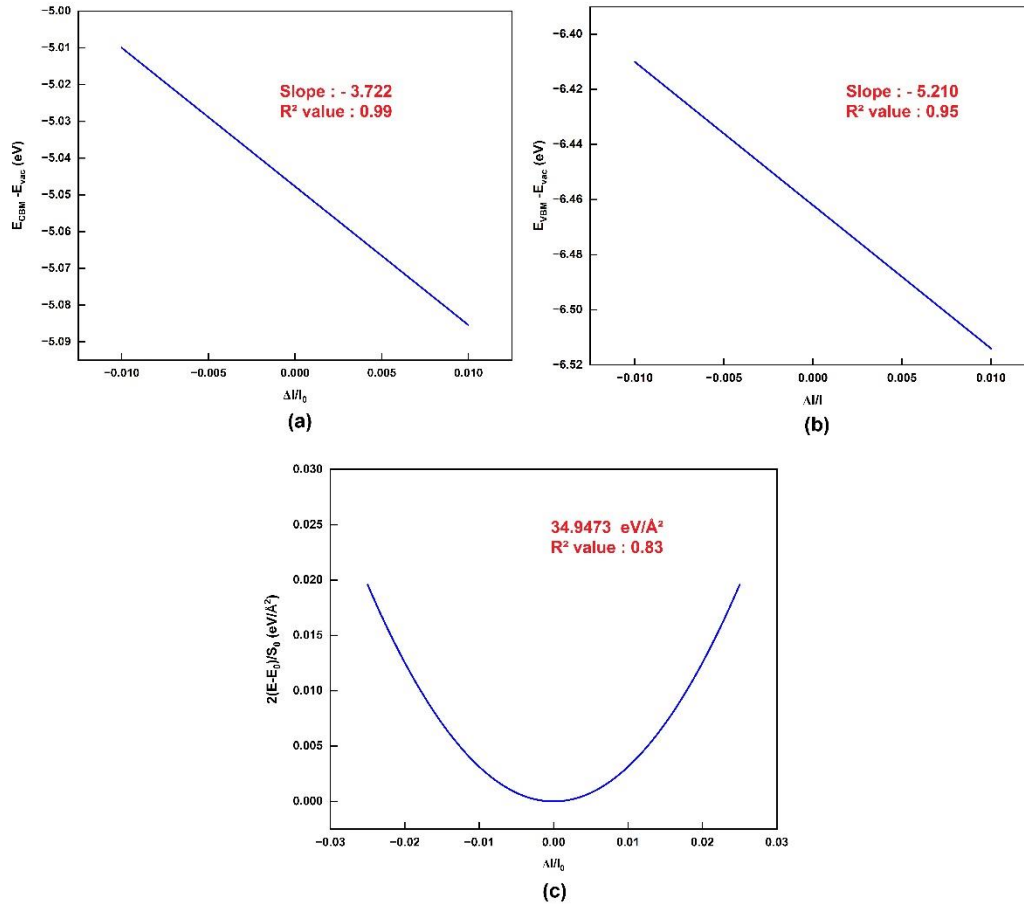

(a) Linear fitting of deformation potential for the electron, (b) Linear fitting of deformation potential for the hole, and (c) curve fitting of elastic modulus of Oh-B<sub>2</sub>S<sub>2</sub> monolayer.

**Calculated: Electron mobility:  $\mu$  (K-F):  $790 \times 10^2 \text{ cm}^2 \text{ V}^{-1} \text{ s}^{-1}$**

**Hole mobility:  $\mu$  (K-F):  $32 \times 10^2 \text{ cm}^2 \text{ V}^{-1} \text{ s}^{-1}$**

## For MoS<sub>2</sub> system

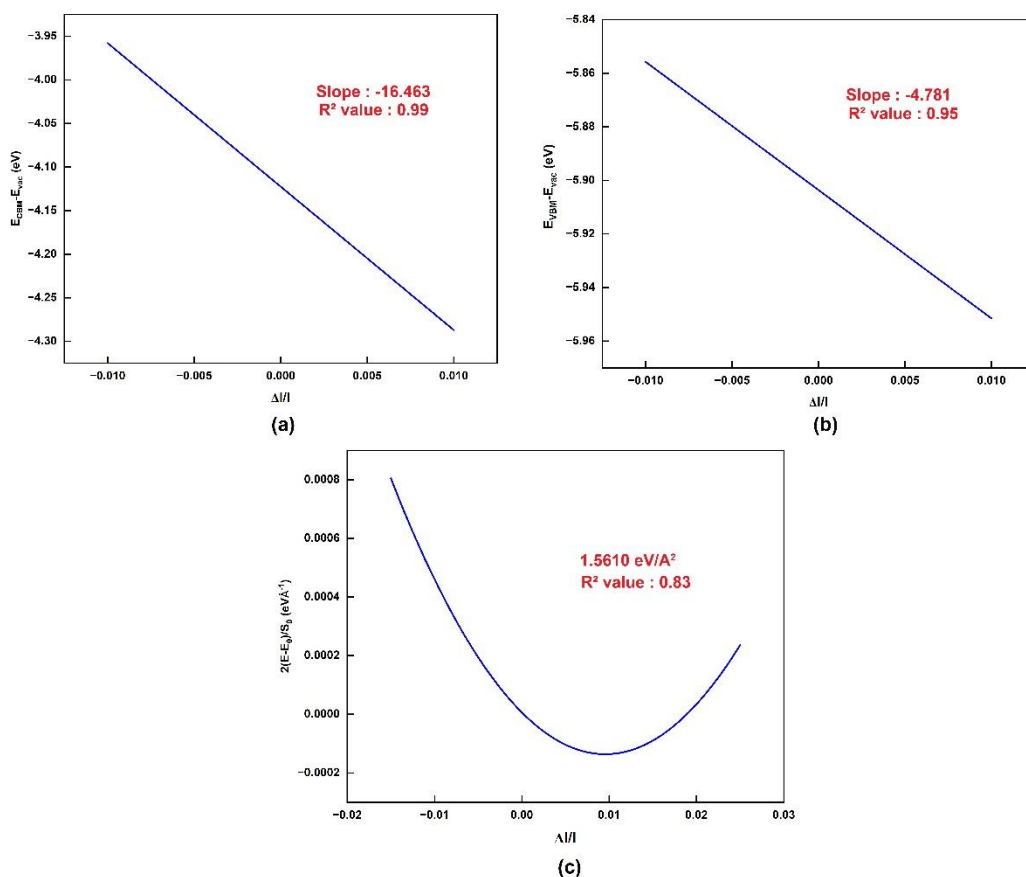

(a) Linear fitting of deformation potential for the electron, (b) Linear fitting of deformation potential for the hole, and (c) curve fitting of elastic modulus of MoS<sub>2</sub> monolayer.

**Calculated: Electron mobility:  $\mu$  (K-M): 280 cm<sup>2</sup> V<sup>-1</sup> s<sup>-1</sup>**

**Hole mobility:  $\mu$  (K-M): 161 cm<sup>2</sup> V<sup>-1</sup> s<sup>-1</sup>**

**Fig. S4:** Linear fitting deformation potential and curve fitting elastic modulus plots of h-B<sub>2</sub>S<sub>2</sub>, Oh-B<sub>2</sub>S<sub>2</sub>, and MoS<sub>2</sub>.



**Table S2:** Effective mass and deformation potential of electrons and holes, and elastic modulus of MoS<sub>2</sub> and Oh-B<sub>2</sub>S<sub>2</sub> monolayer.

| Systems                          | Effective mass ( $M_0$ )                 |                                          | Deformation Potential |      | Elastic Modulus ( $\text{J m}^{-2}$ ) |
|----------------------------------|------------------------------------------|------------------------------------------|-----------------------|------|---------------------------------------|
|                                  | electron                                 | hole                                     | electron              | hole |                                       |
| MoS <sub>2</sub>                 | 0.45 (Reported) [4]<br>0.31 (Calculated) | 0.62 (Reported) [4]<br>0.43 (Calculated) | 16.46                 | 4.78 | 246.60                                |
| Oh-B <sub>2</sub> S <sub>2</sub> | 0.11                                     | 0.31                                     | 3.72                  | 5.2  | 559.15                                |

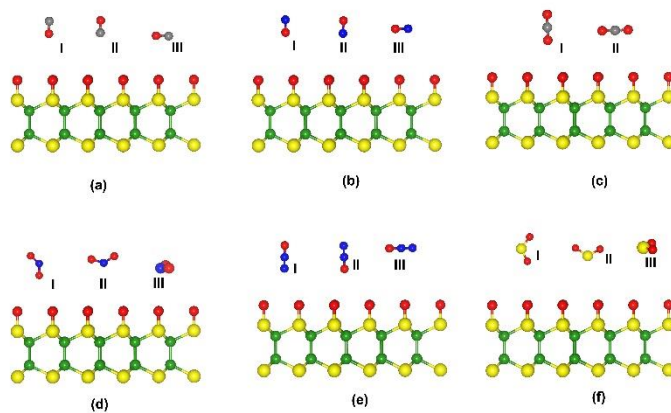

**Fig. S5:** Different orientations of (a) CO, (b) NO, (c) CO<sub>2</sub>, (d) NO<sub>2</sub>, (e) N<sub>2</sub>O, and (f) SO<sub>2</sub> molecules on Oh-B<sub>2</sub>S<sub>2</sub> monolayer.

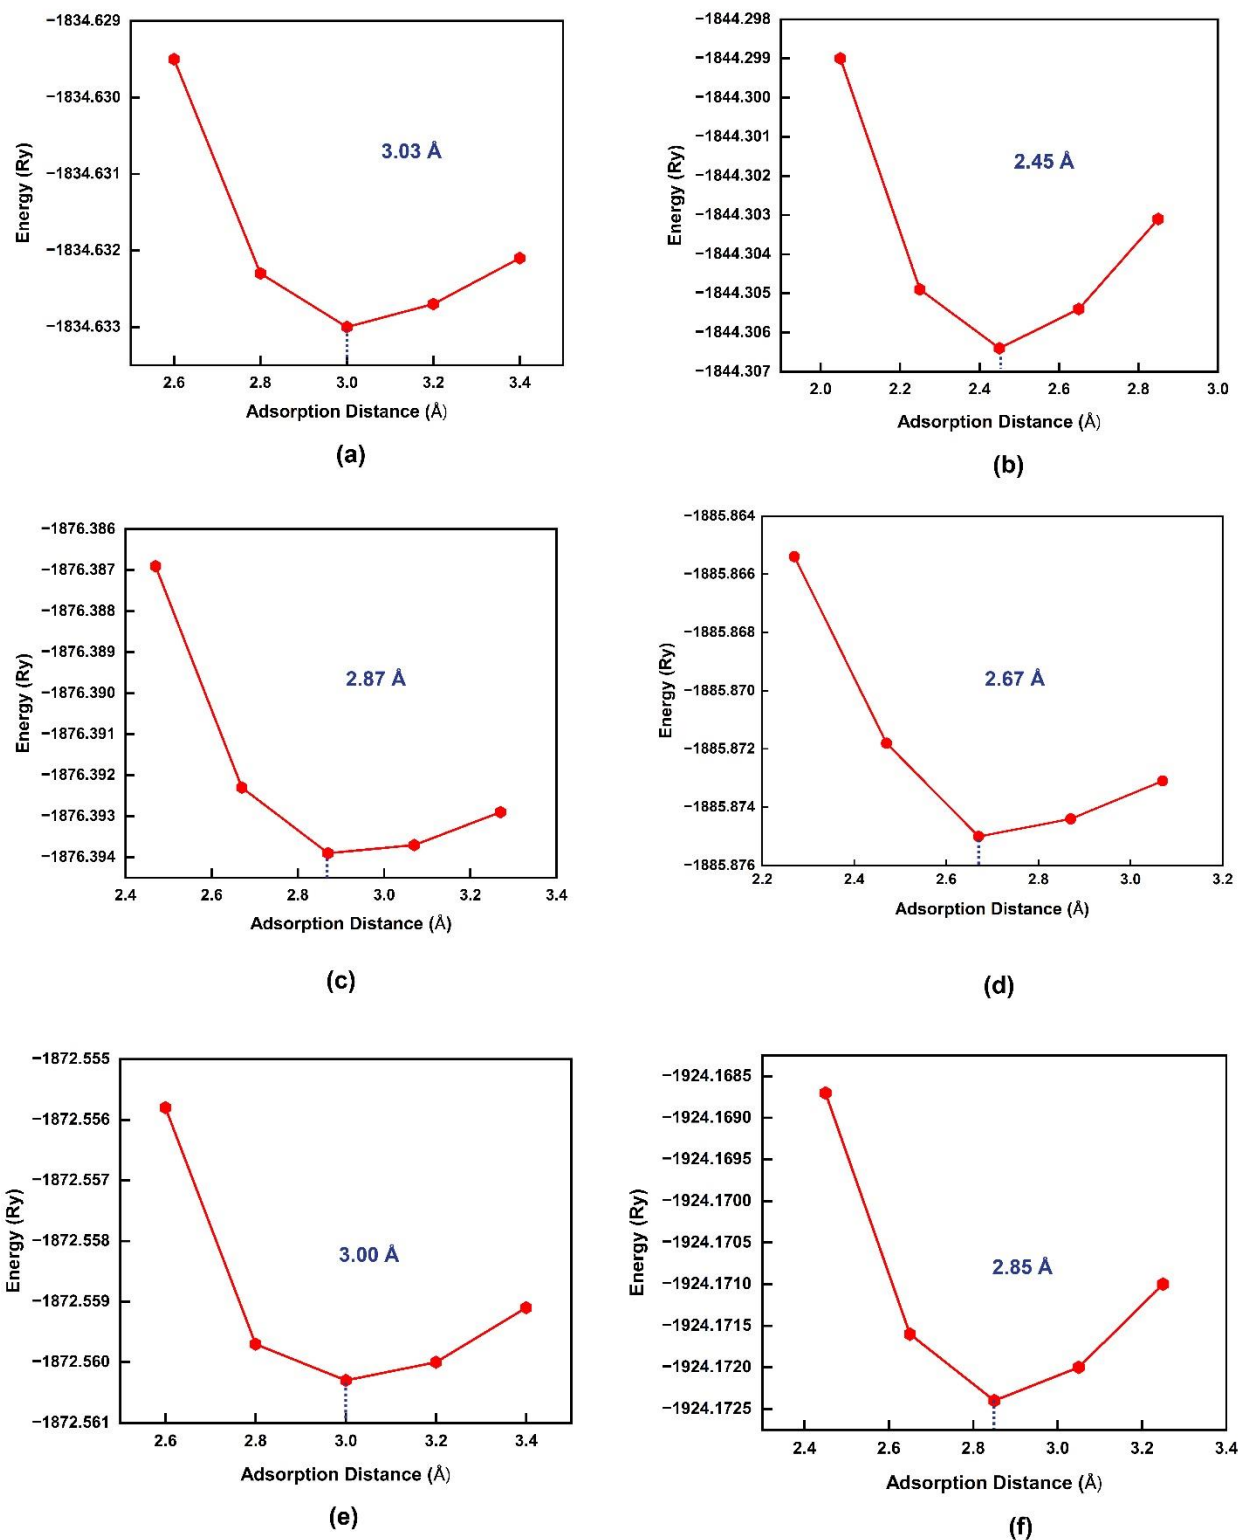

**Fig. S6:** Potential energy curves (PECs) of (a) CO, (b) NO, (c) CO<sub>2</sub>, (d) NO<sub>2</sub>, (e) N<sub>2</sub>O, and (f) SO<sub>2</sub> molecules on Oh-B<sub>2</sub>S<sub>2</sub> monolayer.

**Table S3:** Results obtained from spin-polarized density functional theory (SPDFT).

| Molecule/Supercell | $E_{\text{ads}}$ (eV) | AD ( $\text{\AA}$ ) | $Q_e$ |
|--------------------|-----------------------|---------------------|-------|
| NO                 | -0.50                 | 2.45                | 0.29  |
| NO <sub>2</sub>    | -0.12                 | 2.67                | 0.11  |

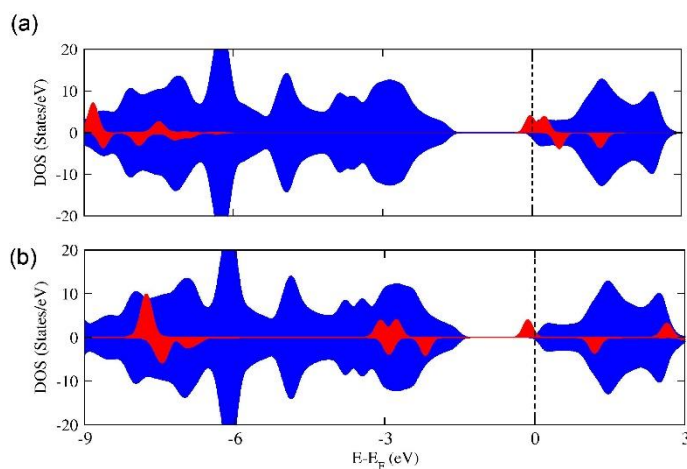**Fig. S7:** Spin-polarized density of states (SPDOS) (a) NO and (b) NO<sub>2</sub> -adsorbed Oh-B<sub>2</sub>S<sub>2</sub> monolayer. Blue and red are the density of states (DOS) of Oh-B<sub>2</sub>S<sub>2</sub> monolayer and gas molecules, respectively.**Table S4:** Adsorption energies ( $E_{\text{ads}}$ ), adsorption distances (AD), and charge transfer ( $Q_e$ ) values of NO and NO<sub>2</sub>-adsorbed Oh-B<sub>2</sub>S<sub>2</sub> monolayer for 4×4 and 5×5 supercells.

| Molecule/Supercell    | $E_{\text{ads}}$ (eV) | AD ( $\text{\AA}$ ) | $Q_e$ |
|-----------------------|-----------------------|---------------------|-------|
| NO (3×3)              | -0.56                 | 2.45                | 0.34  |
| NO (4×4)              | -0.57                 | 2.45                | 0.34  |
| NO (5×5)              | -0.60                 | 2.46                | 0.33  |
| NO (3×3)              | -0.16                 | 2.65                | 0.13  |
| NO <sub>2</sub> (4×4) | -0.17                 | 2.65                | 0.15  |
| NO <sub>2</sub> (5×5) | -0.17                 | 2.67                | 0.14  |

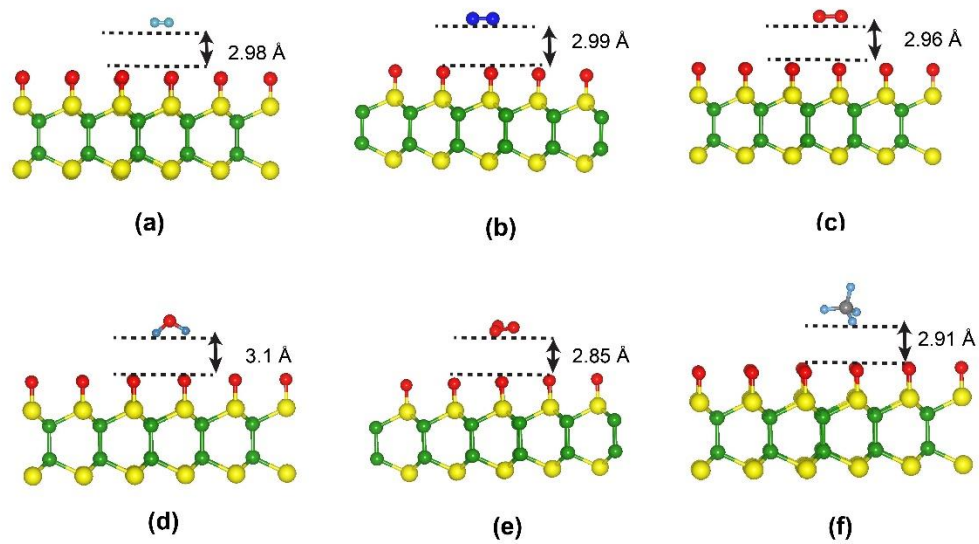

**Fig. S8:** The optimized geometries associated with the favorable adsorption configuration for (a) H<sub>2</sub>, (b) N<sub>2</sub>, (c) O<sub>2</sub> (d) H<sub>2</sub>O, (e) O<sub>3</sub>, and (f) CH<sub>4</sub> on Oh-B<sub>2</sub>S<sub>2</sub> monolayer.

**Table S5:** Adsorption energies ( $E_{\text{ads}}$ ) and charge transfer ( $Q_e$ ) values of NO, NO<sub>2</sub>, H<sub>2</sub>, N<sub>2</sub>, O<sub>2</sub>, H<sub>2</sub>O, O<sub>3</sub>, and CH<sub>4</sub> on Oh-B<sub>2</sub>S<sub>2</sub> monolayer.

| Gas Molecule     | Orientation   | $E_{\text{ads}}$ (eV) | $Q_e$ |
|------------------|---------------|-----------------------|-------|
| NO               | Parallel      | -0.56                 | 0.34  |
|                  | Through N     | -0.50                 | -     |
|                  | Through O     | -0.54                 | -     |
| NO <sub>2</sub>  | Parallel      | -0.16                 | 0.13  |
|                  | Through N     | -0.08                 | -     |
|                  | Through O     | -0.15                 | -     |
| H <sub>2</sub>   | Parallel      | -0.03                 | 0.004 |
|                  | Perpendicular | -0.03                 | -     |
| N <sub>2</sub>   | Parallel      | -0.07                 | 0.007 |
|                  | Perpendicular | -0.05                 | -     |
| O <sub>2</sub>   | Parallel      | -0.09                 | 0.08  |
|                  | Perpendicular | -0.07                 | -     |
| H <sub>2</sub> O | Parallel      | -0.12                 | 0.05  |
|                  | Through O     | -0.11                 | -     |
|                  | Through H     | -0.08                 | -     |
| O <sub>3</sub>   | Parallel      | -0.10                 | 0.02  |
|                  | Perpendicular | -0.06                 | -     |
| CH <sub>4</sub>  | Parallel      | -0.10                 | 0.02  |
|                  | Perpendicular | -0.10                 | -     |

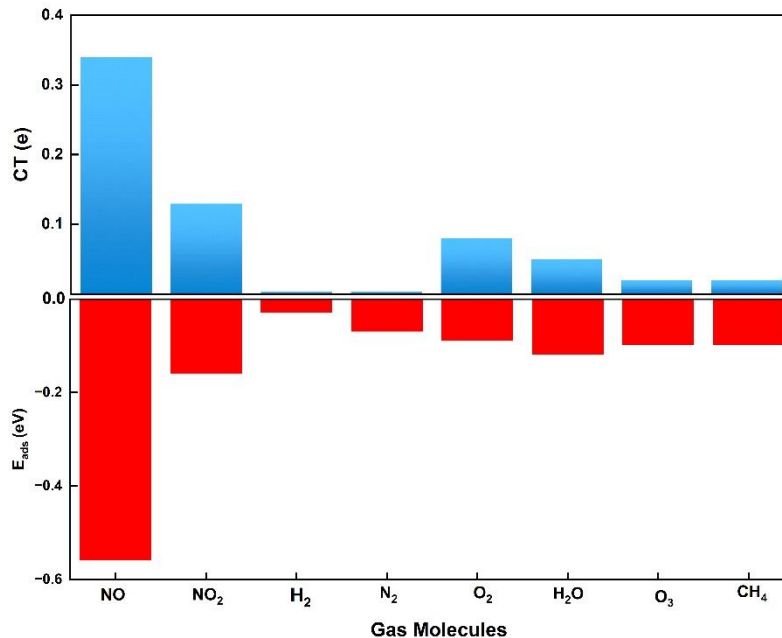

**Fig. S9:** Adsorption energies ( $E_{\text{ads}}$ ) and charge transfer ( $Q_e$ ) plots of NO, NO<sub>2</sub>, H<sub>2</sub>, N<sub>2</sub>, O<sub>2</sub>, H<sub>2</sub>O, O<sub>3</sub>, and CH<sub>4</sub> on Oh-B<sub>2</sub>S<sub>2</sub> monolayer.

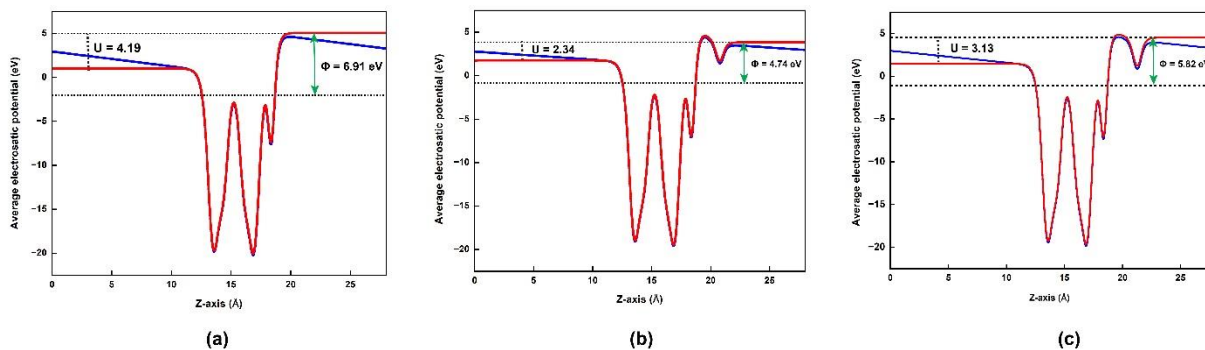

**Fig. S10:** Average electrostatic potential plots of (a) Oh-B<sub>2</sub>S<sub>2</sub>, (b) NO-adsorbed Oh-B<sub>2</sub>S<sub>2</sub>, and (c) NO<sub>2</sub>-adsorbed Oh-B<sub>2</sub>S<sub>2</sub> monolayer. The blue and red plots depict the without dipole correction and with dipole correction.

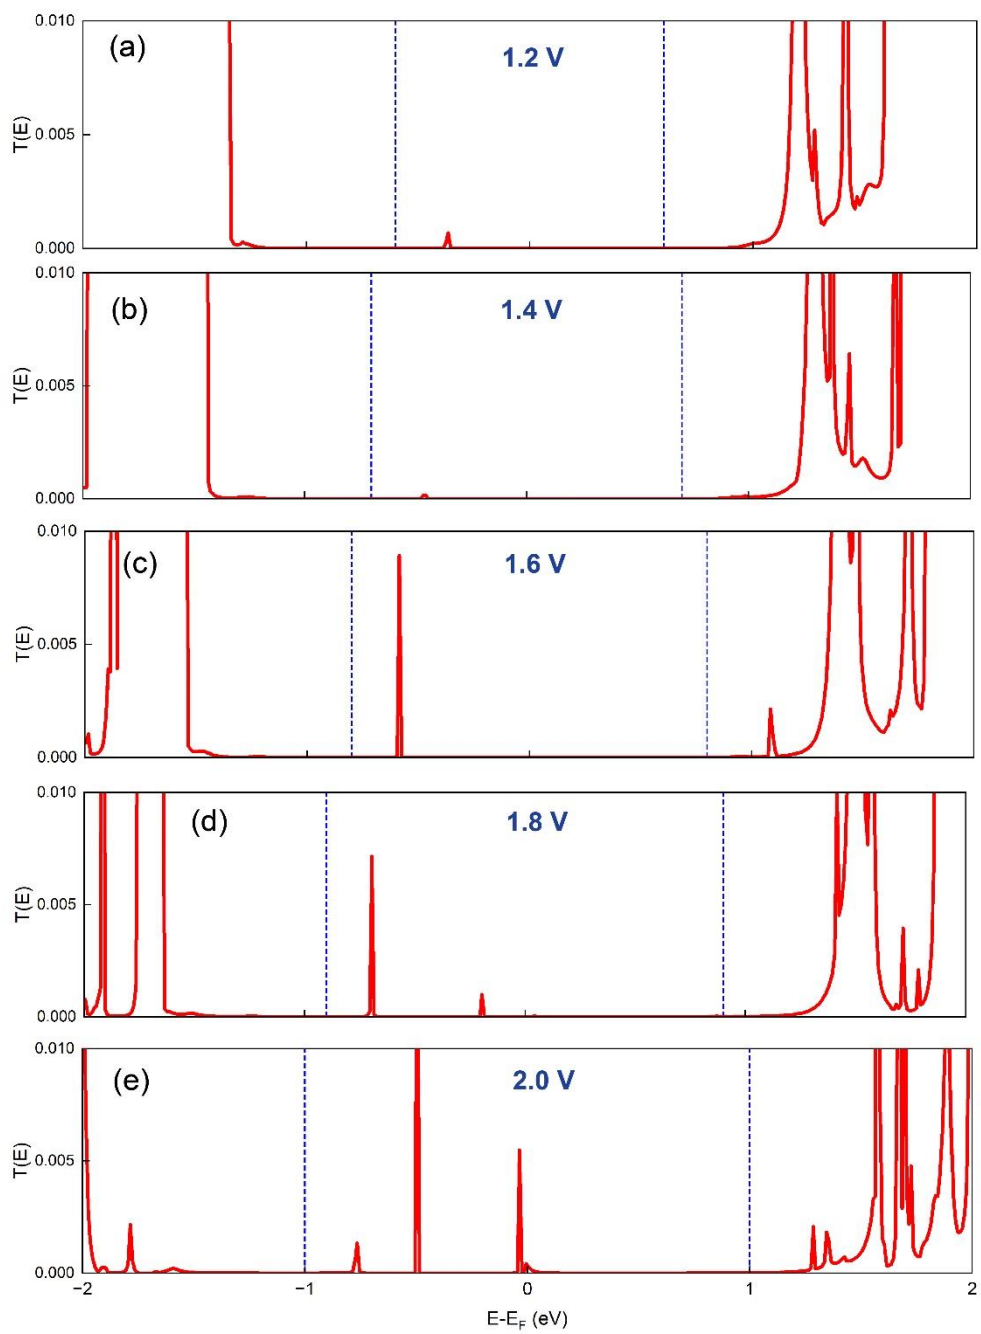

**Fig. S11:** Transmission spectra  $T(E)$  plots of Oh-B<sub>2</sub>S<sub>2</sub> at different bias voltages.

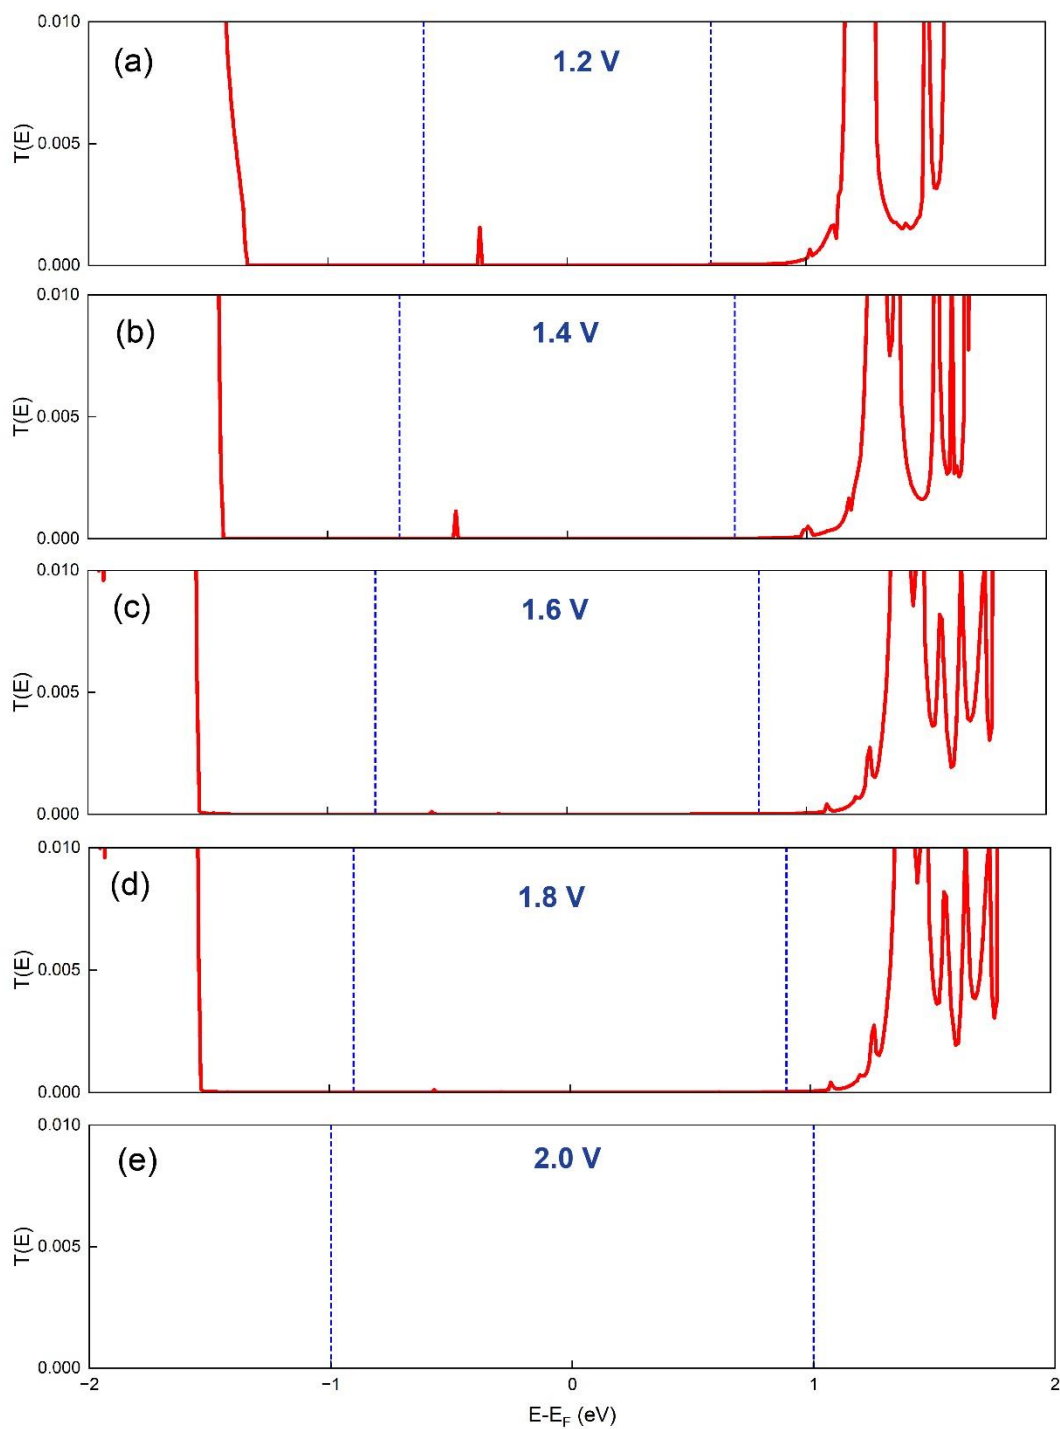

**Fig. S12:** Transmission spectra  $T(E)$  plots of NO-adsorbed Oh- $B_2S_2$  at different bias voltages.



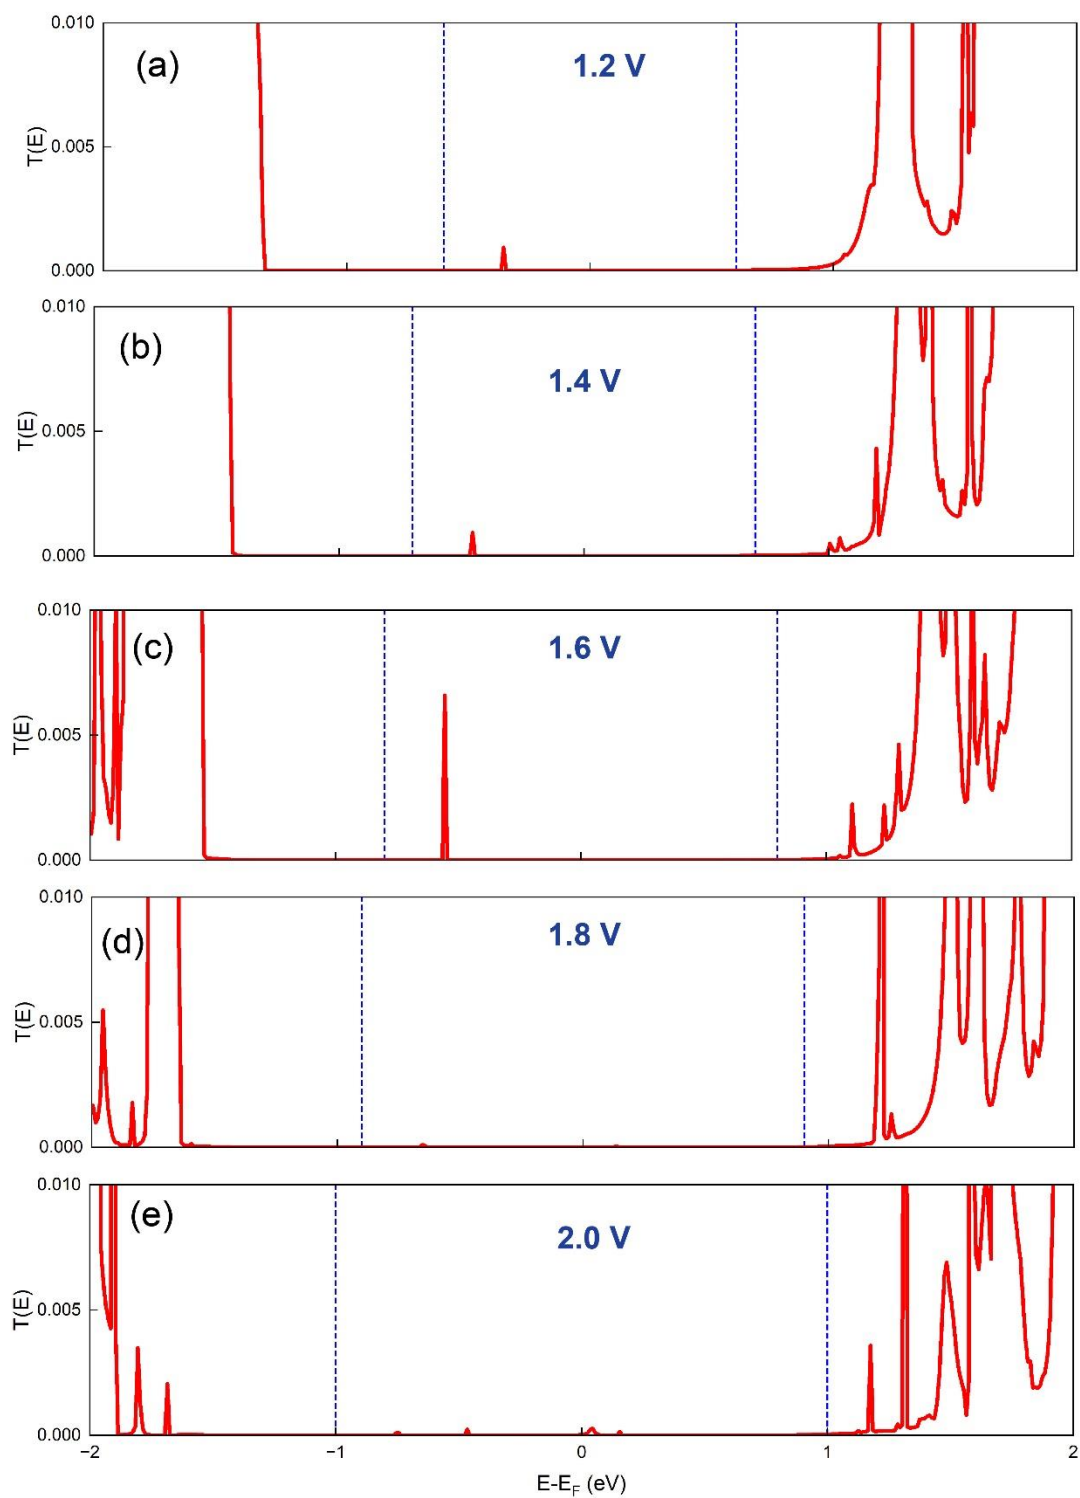

**Fig. S13:** Transmission spectra  $T(E)$  plots of  $\text{NO}_2$ -adsorbed Oh- $\text{B}_2\text{S}_2$  at different bias voltages.

## References

1. Y. Zhang, M. Zhou, M. Yang, J. Yu, W. Li, X. Li and S. Feng, *ACS Appl. Mater. Interfaces*, 2022, **14**, 32330–32340.
2. X. Liang, S.-P. Ng, N. Ding and C.-M. L. Wu, *Comput. Mater. Sci.*, 2018, **151**, 214–221.
3. C. Tang, F. Ma, C. Zhang, Y. Jiao, S. K. Matta, K. Ostrikov and A. Du, *J. Mater. Chem. C*, 2019, **7**, 1651–1658.
4. H. V. Phuc, N. N. Hieu, B. D. Hoi, N. V. Hieu, T. V. Thu, N. M. Hung, V. V. Ilyasov, N. A. Poklonski and C. V. Nguyen, *J. Elec. Mater.*, 2018, **47**, 730–736.
